# Supplementary material
Source: Research Square preprint supplement (doi:10.21203/rs.3.rs-8980457/v1)
Supplement: Supplementary file 1 [file 02e6069690412ee3a5239ac2.docx]

**Supplementary Information**

Manuscript title
Intra articular allogeneic umbilical cord mesenchymal stromal cells for knee osteoarthritis a systematic review and meta-analysis of controlled trials

Authors
Kirk Sanford, DC
Félix Porras, MD
Fergie Martínez, MD, MSc
Hugo Ramos, MD
Janine Zamitiz, MD, MSc
Carlos Green, MSc
Edward Ramsay, MSc

Supplementary Table S1. Baseline and clinical improvement support (controlled steroid comparator trial).

This table summarizes baseline WOMAC values and baseline-to-12-month percent improvement reported in the trial results, supporting durability interpretation.

| **Study** | **Arm** | **Baseline WOMAC pain (mean ± SD)** | **Baseline WOMAC total (mean ± SD)** | **WOMAC pain percent improvement at 12 months** | **WOMAC total percent improvement at 12 months** | **Notes** |
| --- | --- | --- | --- | --- | --- | --- |
| Pico 2025 | UC-MSC | 7.57 ± 2.40 | 30.07 ± 14.82 | 53.77% | 47.26% | Percent change reported in trial table |
| Pico 2025 | Triamcinolone | 7.93 ± 3.69 | 29.80 ± 17.88 | 19.3% | -0.2% | Percent change reported in trial table |
