# Supplementary material
Source: Research Square preprint supplement (doi:10.21203/rs.3.rs-8980457/v1)
Supplement: Supplementary file 2 [file 16a09674250627daba03fdd7.pdf]

## PRISMA 2020 Checklist

Manuscript: Intra articular allogeneic umbilical cord mesenchymal stromal cells for knee osteoarthritis a systematic review and meta-analysis of controlled trials

| <b>Section and Topic</b>          | <b>Item #</b> | <b>Checklist Item</b>                                        | <b>Reported in Manuscript</b>                                            |
|-----------------------------------|---------------|--------------------------------------------------------------|--------------------------------------------------------------------------|
| TITLE                             | 1             | Identify the report as a systematic review                   | Title page                                                               |
| ABSTRACT                          | 2             | See PRISMA 2020 for Abstracts checklist                      | Abstract section                                                         |
| INTRODUCTION                      | 3             | Describe rationale for the review                            | Introduction                                                             |
| INTRODUCTION                      | 4             | Provide explicit statement of objectives                     | Introduction (final paragraph)                                           |
| METHODS – Eligibility criteria    | 5             | Specify inclusion and exclusion criteria                     | Methods – Eligibility Criteria                                           |
| METHODS – Information sources     | 6             | Specify all databases, registers, and other sources searched | Methods; Declarations Data Availability                                  |
| METHODS – Search strategy         | 7             | Present full search strategy                                 | Methods (database search described; search terms available upon request) |
| METHODS – Selection process       | 8             | Specify methods used to decide whether studies met criteria  | Methods – Study Selection; PRISMA Flow Counts in Results                 |
| METHODS – Data collection process | 9             | Specify methods of data extraction                           | Methods – Data Extraction                                                |
| METHODS – Data items              | 10a           | List outcomes and definitions                                | Methods – Outcomes                                                       |

| <b>Section and Topic</b>            | <b>Item #</b> | <b>Checklist Item</b>                                         | <b>Reported in Manuscript</b>                                 |
|-------------------------------------|---------------|---------------------------------------------------------------|---------------------------------------------------------------|
| METHODS – Data items                | 10b           | List other variables collected                                | Methods – Data Extraction                                     |
| METHODS – Risk of bias assessment   | 11            | Specify risk of bias methods                                  | Methods – Risk of Bias                                        |
| METHODS – Effect measures           | 12            | Specify effect measures for outcomes                          | Methods – Statistical Analysis                                |
| METHODS – Synthesis methods         | 13a           | Describe process to determine study eligibility for synthesis | Methods – Eligibility Criteria                                |
| METHODS – Synthesis methods         | 13b           | Methods for preparing data                                    | Methods – Data Extraction                                     |
| METHODS – Synthesis methods         | 13c           | Methods for tabulating or visually displaying results         | Tables 1 and 2                                                |
| METHODS – Synthesis methods         | 13d           | Describe synthesis methods and model used                     | Methods – Statistical Analysis (random effects framework)     |
| METHODS – Synthesis methods         | 13e           | Methods to explore heterogeneity                              | Methods – Statistical Analysis (comparator subgroup analysis) |
| METHODS – Synthesis methods         | 13f           | Sensitivity analyses                                          | Not performed due to limited number of trials                 |
| METHODS – Reporting bias assessment | 14            | Methods used to assess reporting bias                         | Not formally assessed due to limited study number             |
| METHODS – Certainty assessment      | 15            | Methods to assess certainty of evidence                       | Discussion – Certainty of Evidence (GRADE)                    |
| RESULTS – Study selection           | 16a           | Describe results of search and selection process              | Results – Study Selection (PRISMA Flow Counts)                |

| <b>Section and Topic</b>                | <b>Item #</b> | <b>Checklist Item</b>                                                 | <b>Reported in Manuscript</b>                           |
|-----------------------------------------|---------------|-----------------------------------------------------------------------|---------------------------------------------------------|
| RESULTS – Study selection               | 16b           | Cite excluded studies and reasons                                     | Results – Study Selection                               |
| RESULTS – Study characteristics         | 17            | Present characteristics of included studies                           | Table 1                                                 |
| RESULTS – Risk of bias                  | 18            | Present risk of bias assessments                                      | Results – Risk of Bias Summary                          |
| RESULTS – Results of individual studies | 19            | Present summary statistics for each study                             | Table 2                                                 |
| RESULTS – Results of syntheses          | 20a           | Summarize characteristics and risk of bias among contributing studies | Results – Risk of Bias Summary                          |
| RESULTS – Results of syntheses          | 20b           | Present results of statistical syntheses                              | Results – Primary and Secondary Outcomes                |
| RESULTS – Results of syntheses          | 20c           | Present investigations of heterogeneity                               | Comparator subgroup interpretation described in Results |
| RESULTS – Results of syntheses          | 20d           | Sensitivity analyses                                                  | Not performed                                           |
| RESULTS – Reporting biases              | 21            | Present assessment of reporting biases                                | Not formally assessed                                   |
| RESULTS – Certainty of evidence         | 22            | Present certainty of evidence assessment                              | Discussion – Certainty of Evidence (GRADE)              |
| DISCUSSION – Interpretation             | 23a           | Provide general interpretation of results                             | Discussion (first 3 paragraphs)                         |
| DISCUSSION – Limitations                | 23b           | Discuss limitations of evidence                                       | Discussion – Limitations                                |

| <b>Section and Topic</b>                                     | <b>Item #</b> | <b>Checklist Item</b>                               | <b>Reported in Manuscript</b>  |
|--------------------------------------------------------------|---------------|-----------------------------------------------------|--------------------------------|
| DISCUSSION –<br>Limitations                                  | 23c           | Discuss limitations of review process               | Discussion – Limitations       |
| DISCUSSION –<br>Implications                                 | 23d           | Discuss implications for practice and research      | Discussion; Conclusion         |
| OTHER INFORMATION –<br>Registration                          | 24a           | Provide registration information                    | Not registered                 |
| OTHER INFORMATION –<br>Protocol                              | 24b           | Indicate where protocol can be accessed             | No published protocol          |
| OTHER INFORMATION –<br>Amendments                            | 24c           | Describe protocol amendments                        | Not applicable                 |
| OTHER INFORMATION –<br>Support                               | 25            | Describe sources of financial/non-financial support | Funding section                |
| OTHER INFORMATION –<br>Competing interests                   | 26            | Declare competing interests                         | Conflict of Interest Statement |
| OTHER INFORMATION –<br>Availability of data, code, materials | 27            | Report availability of materials                    | Data Availability section      |
